# Supplementary material for: Preparing high surface area porous carbon from biomass by carbonization in a molten salt medium
Source: Royal Society of Chemistry journal article supplement (doi:10.1039/c5ra12406a), 2015-01-01
Supplement: c5ra12406a1.pdf [file c5ra12406a1.pdf]

## Supporting information

### EDS analysis of porous carbon

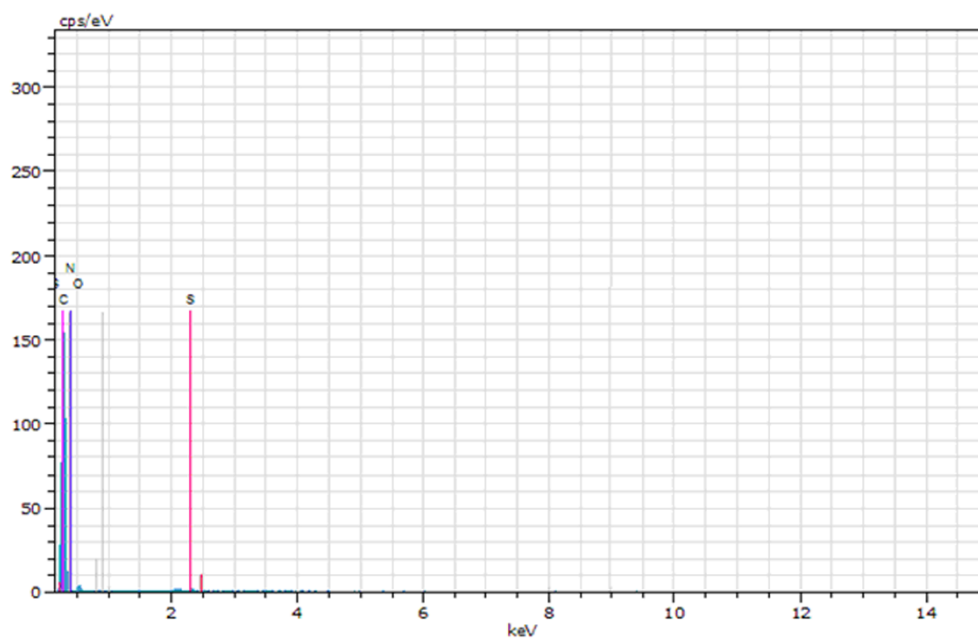

| El | AN | Series | unn. C | norm. C | Atom. C | Error  |
|----|----|--------|--------|---------|---------|--------|
|    |    |        | [wt.%] | [wt.%]  | [at.%]  | [wt.%] |

|   |    |          |       |       |       |      |
|---|----|----------|-------|-------|-------|------|
| C | 6  | K-series | 88.78 | 88.78 | 91.54 | 10.6 |
| O | 8  | K-series | 8.13  | 8.13  | 5.97  | 1.6  |
| N | 7  | K-series | 2.61  | 2.61  | 2.30  | 1.2  |
| S | 16 | K-series | 0.47  | 0.47  | 0.18  | 0.1  |

Total: 100.00 100.00 100.00
